# Supplementary material for: An integrated computational and experimental study uncovers FUT9 as a metabolic driver of colorectal cancer
Source: PubMed Central journal article supplement (PMC5740504; doi:10.15252/msb.20177739), 2017-12-01
Supplement: MSB-13-956-s012.pdf [file MSB-13-956-s012.pdf]

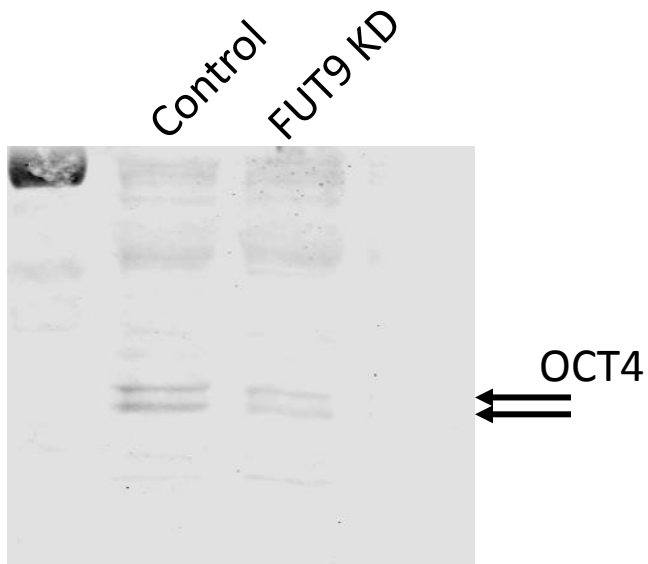

WB anti-OCT4

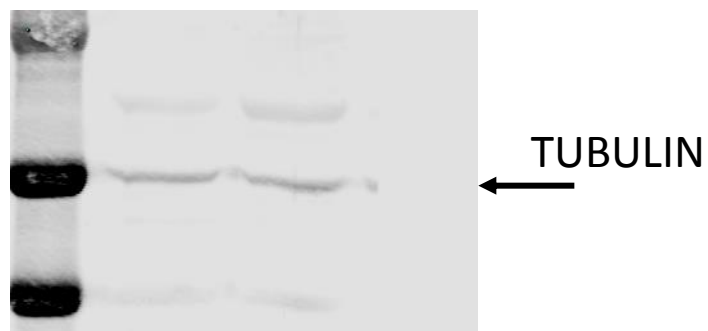

WB anti-TUBULIN
